# Supplementary material for: In situ study of the thermal stability of supported Pt nanoparticles and their stabilization via atomic layer deposition overcoating
Source: Royal Society of Chemistry journal article supplement (doi:10.1039/d0nr02444a), 2020-01-01
Supplement: d0nr02444a1.pdf [file d0nr02444a1.pdf]

— Supporting information available —

# *In situ* study on the thermal stability of supported Pt nanoparticles and their stabilization via Atomic Layer Deposition overcoating.

Eduardo Solano,<sup>\*a,b‡</sup> Jolien Dendooven,<sup>b‡</sup> Ji-Yu Feng,<sup>b</sup> Philipp Brüner,<sup>c</sup> Matthias M. Minjauw,<sup>b</sup> Ranjith K. Ramachandran,<sup>b</sup> Michiel Van Daele,<sup>b</sup> Kevin Van de Kerckhove,<sup>b</sup> Thomas Dobbelaere,<sup>b</sup> Alessandro Coati,<sup>d</sup> Daniel Hermida-Merino<sup>e</sup> and Christophe Detavernier<sup>b</sup>

<sup>a</sup> *NCD-SWEET beamline, ALBA Synchrotron Light Source, Carrer de la Llum 2-26, 08290 Cerdanyola del Vallès, Spain.* <sup>b</sup> *Department of Solid State Sciences, CoCooN, Ghent University, Krijgslaan 281/S1, 9000 Ghent, Belgium.* <sup>c</sup> *IONTOF Technologies GmbH, Heisenbergstr. 15 48149 Muenster, Germany.* <sup>d</sup> *SIXS beamline, Synchrotron SOLEIL, L'Orme des Merisiers Saint-Aubin BP 48 91192 Gif-sur-Yvette, France* <sup>e</sup> *DUBBLE beamline, ESRF, Avenue des Martyrs 71, 38000 Grenoble, France* <sup>‡</sup> *E.S. and J.D. equally contributed to this work.*

\* *Corresponding author: esolano@cells.es*

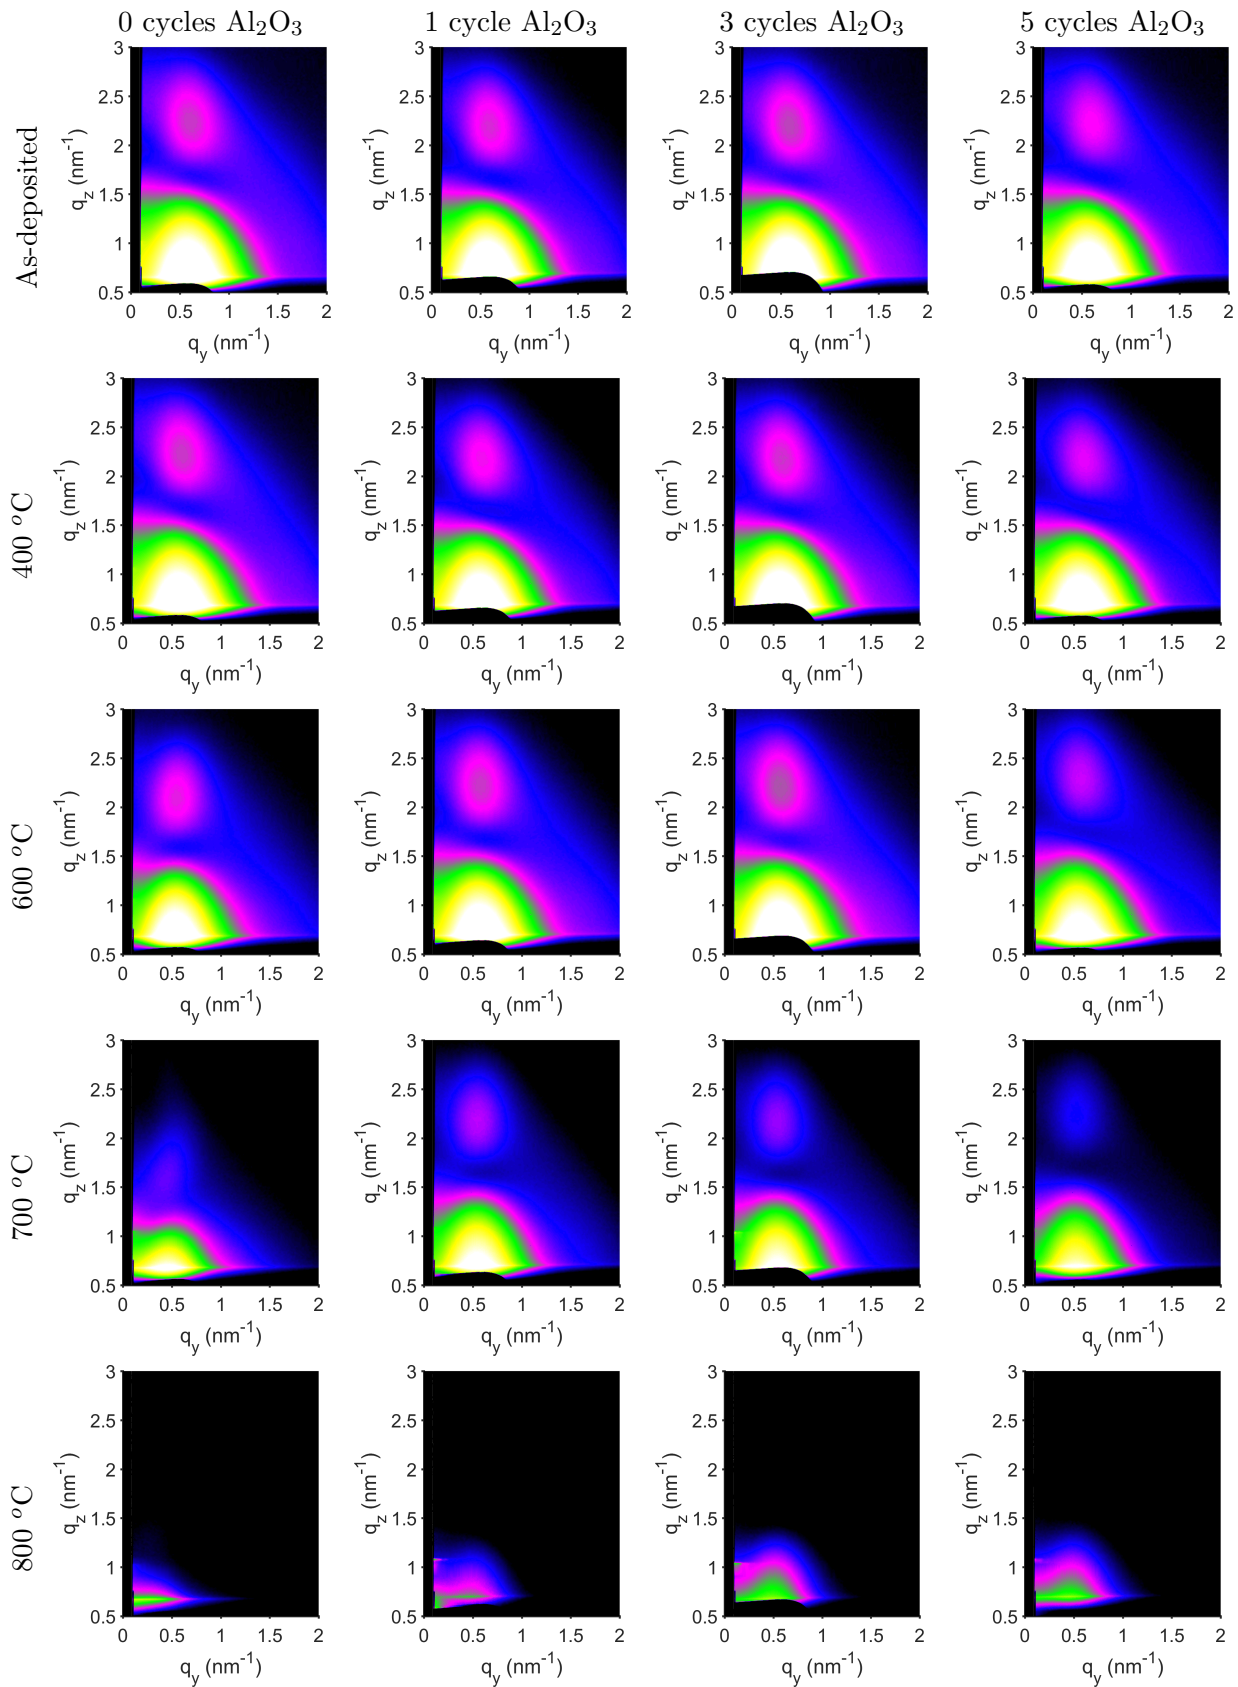

Figure S.1: Selected snapshots of the continuous GISAXS images acquired during the *in situ* experiments of the Pt-O sample with different overcoat layers.

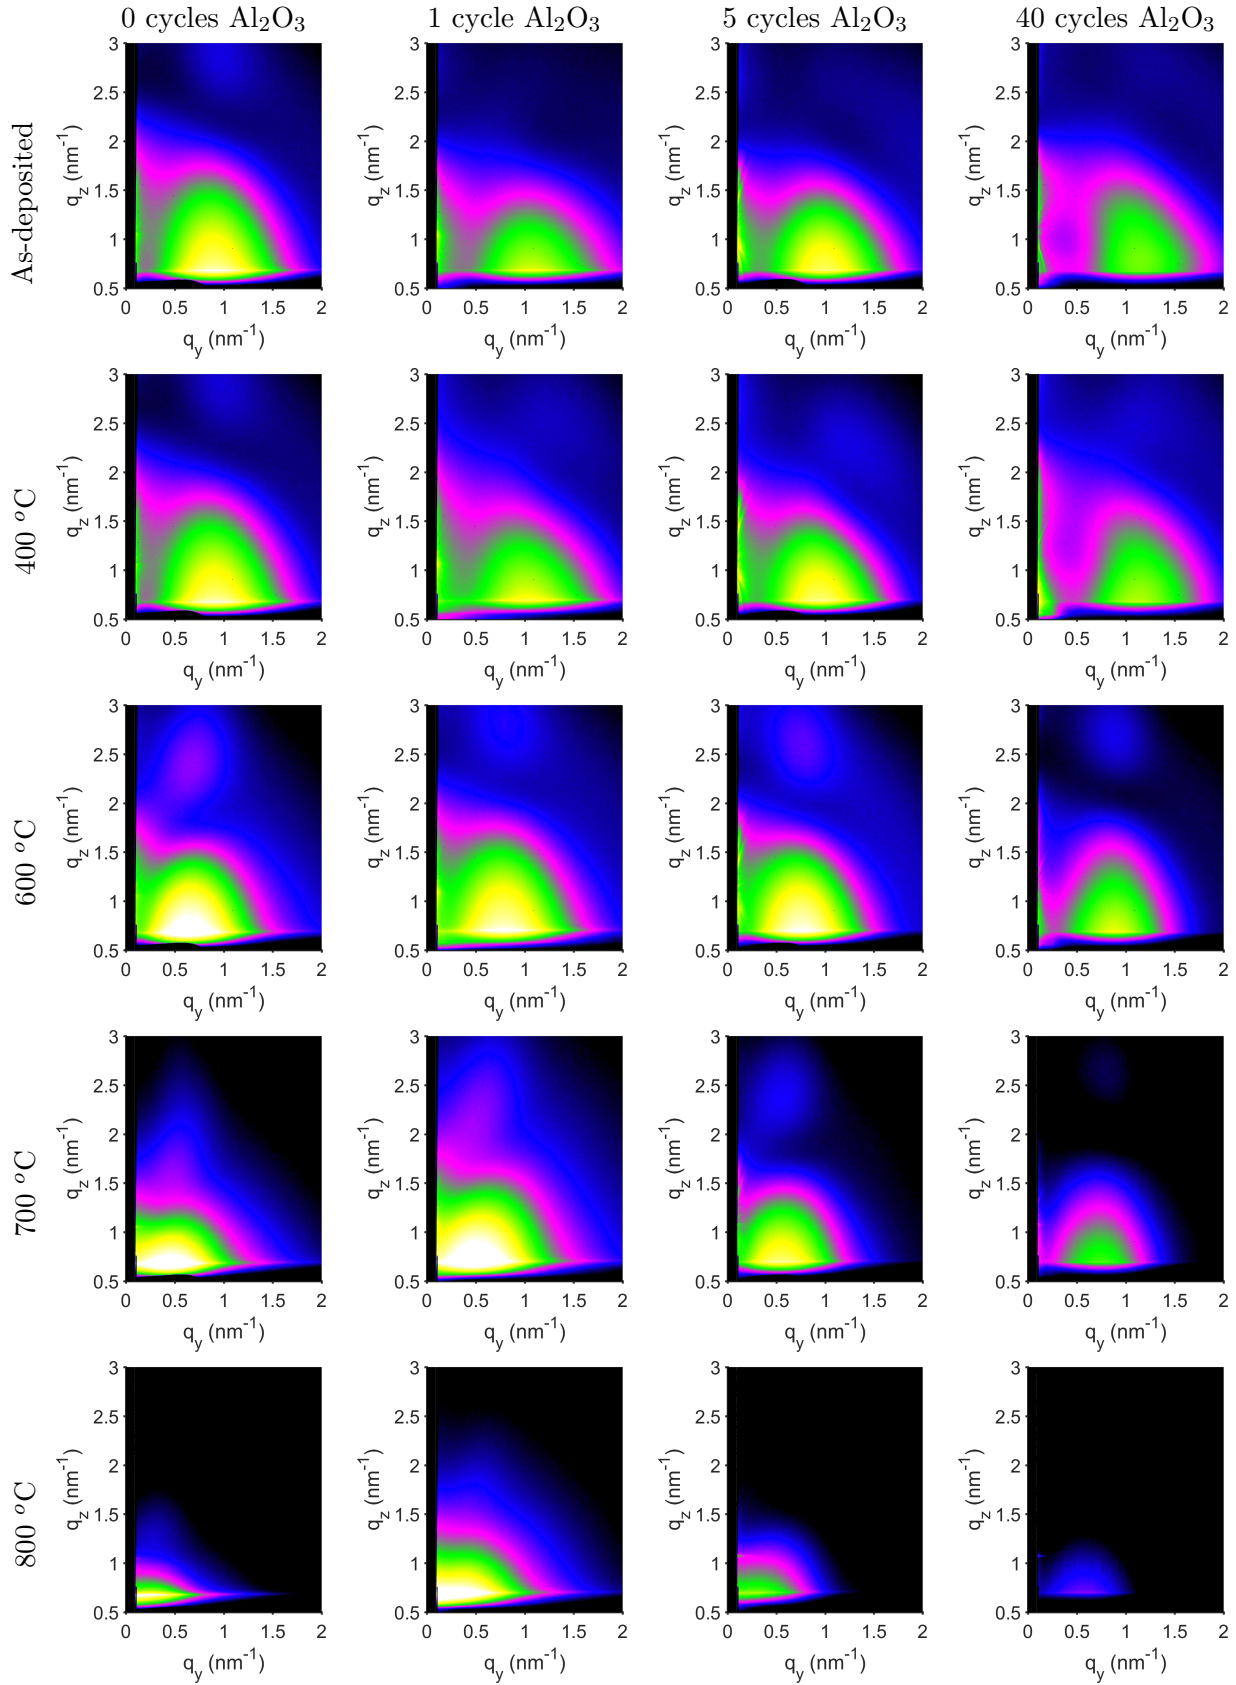

Figure S.2: Selected snapshots of the continuous GISAXS images acquired during the *in situ* experiments of the Pt-N sample with different overcoat layers.

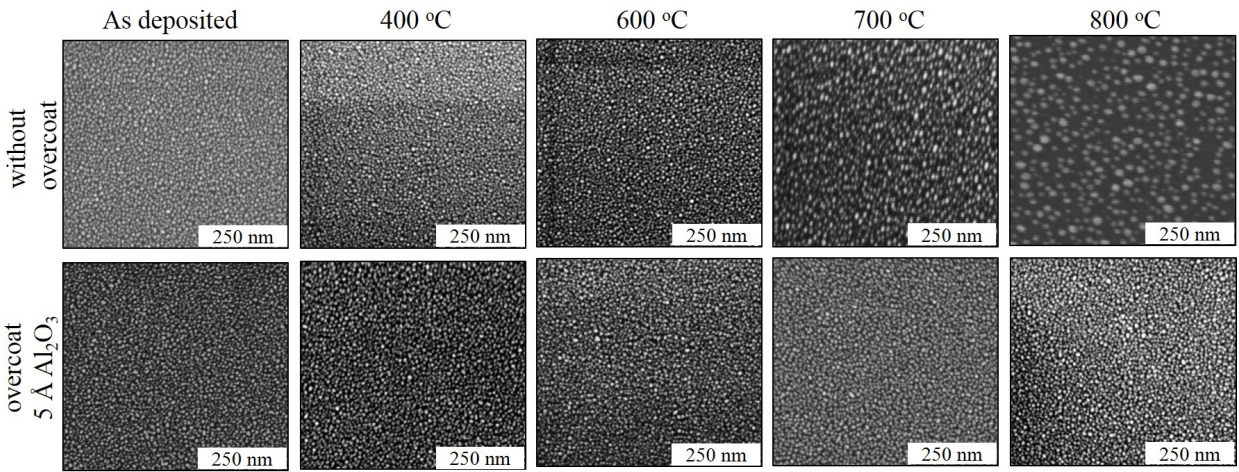

Figure S.3: SEM images of some representative quenches of the as-deposited and after 5 cycles of Al<sub>2</sub>O<sub>3</sub> overcoat Pt-O sample during the annealing treatment.

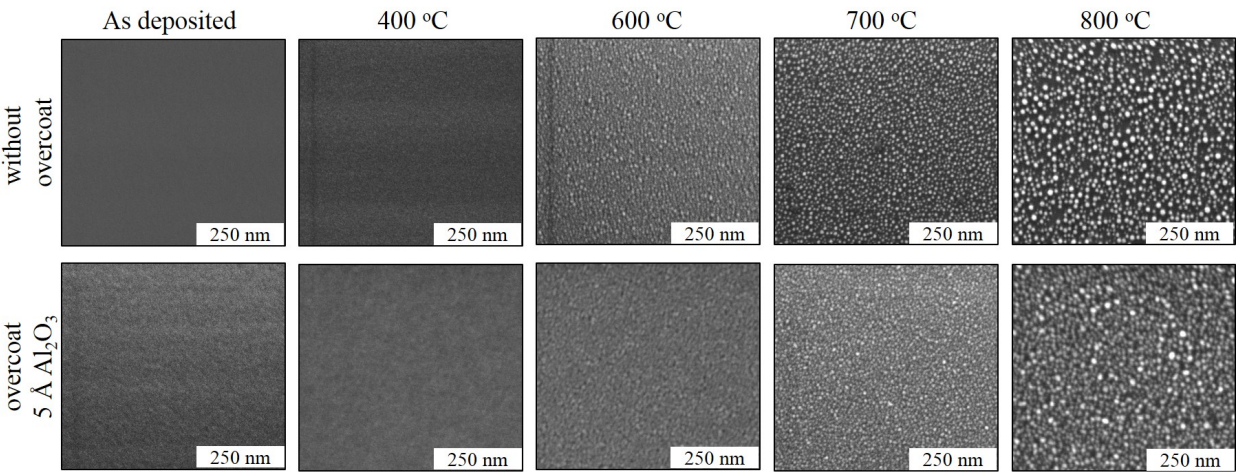

Figure S.4: SEM images of some representative quenches of the as-deposited and after 5 cycles of Al<sub>2</sub>O<sub>3</sub> overcoat Pt-N sample during the annealing treatment.

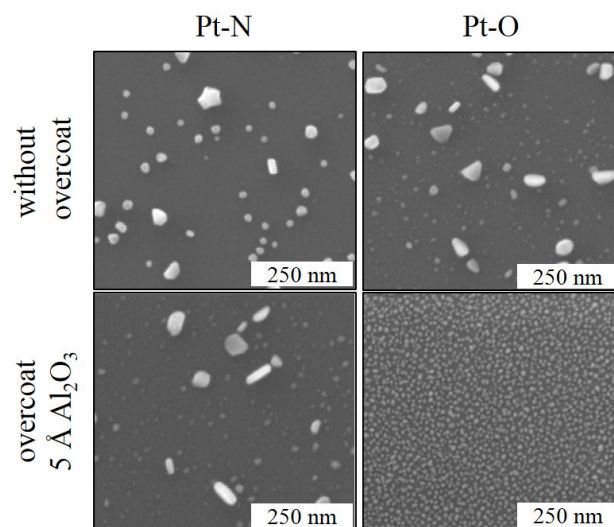

Figure S.5: SEM images of Pt-N and Pt-O samples with and without 5 cycles of Al<sub>2</sub>O<sub>3</sub> overcoating after 3 h of isothermal annealing at 800 °C.

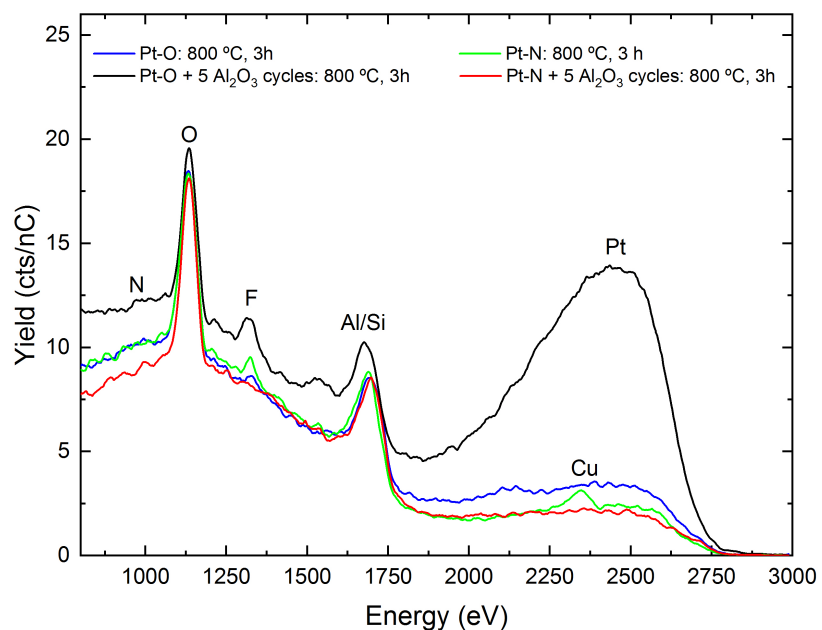

Figure S.6: LEIS data of Pt-O and Pt-N samples after an isothermal annealing at 800 °C during 3h. LEIS proved that overcoating of Pt-O sample with 5 cycles of Al<sub>2</sub>O<sub>3</sub> efficiently prevented particle coarsening, since it presented a higher amount of exposed Pt.
